# Supplementary material for: Blast-Induced Tinnitus and Elevated Central Auditory and Limbic Activity in Rats: A Manganese-Enhanced MRI and Behavioral Study
Source: PubMed Central journal article supplement (PMC5501813; doi:10.1038/s41598-017-04941-w), 2017-07-07
Supplement: 41598_2017_4941_MOESM1_ESM.pdf [file 41598_2017_4941_MOESM1_ESM.pdf]

**Supplementary Material**

**Blast-Induced Tinnitus and Elevated Central Auditory and Limbic Activity  
in Rats: A Manganese-Enhanced MRI and Behavioral Study**

Jessica Ouyang<sup>(1)†</sup>, Edward Pace<sup>(1)†</sup>, Laura Lepczyk<sup>(1)†</sup>, Michael Kaufman<sup>(1)</sup>, Jessica Zhang<sup>(1)</sup>, Shane A. Perrine<sup>(2)</sup>, Jinsheng Zhang<sup>(1)(3)\*</sup>

<sup>1</sup> *Department of Otolaryngology and Head and Neck Surgery, Wayne State University School of Medicine, Detroit, MI, USA*

<sup>2</sup> *Department of Psychiatry and Behavioral Neurosciences, Wayne State University School of Medicine, Detroit, MI, USA*

<sup>3</sup> *Department of Communication Sciences & Disorders, Wayne State University College of Liberal Arts and Sciences, Detroit, MI, USA*

**Supplementary Table S1:** Effect size and detectable differences calculated between groups, including before and after Bonferroni corrections for multiple comparisons. Of note, the differences between the contrast-to-noise ratios of tinnitus positive and tinnitus negative rats (see Supplementary Table S2) did not exceed the detectable differences listed here in Table S1.

**MEMRI: Detectable Differences**

| Variable               | T+ (n=8) vs. T- (n=5) |           | T+ (n=8) vs. Ctrl (n=6) |           | T- (n=5) vs. Ctrl (n=6) |           |
|------------------------|-----------------------|-----------|-------------------------|-----------|-------------------------|-----------|
|                        | p = 0.05              | p = 0.017 | p = 0.05                | p = 0.017 | p = 0.05                | p = 0.017 |
| <i>Effect Size</i>     | 1.755                 | 2.122     | 1.649                   | 1.985     | 1.907                   | 2.335     |
| <i>L-DCN</i>           | 0.154                 | 0.187     | 0.145                   | 0.175     | 0.168                   | 0.205     |
| <i>L-VCN</i>           | 0.063                 | 0.076     | 0.059                   | 0.071     | 0.068                   | 0.083     |
| <i>L-DCIC</i>          | 0.050                 | 0.060     | 0.047                   | 0.056     | 0.054                   | 0.066     |
| <i>L-CIC</i>           | 0.041                 | 0.049     | 0.038                   | 0.046     | 0.044                   | 0.054     |
| <i>L-ECIC</i>          | 0.055                 | 0.067     | 0.052                   | 0.062     | 0.060                   | 0.073     |
| <i>L-MGB</i>           | 0.041                 | 0.050     | 0.039                   | 0.047     | 0.045                   | 0.055     |
| <i>L-AC</i>            | 0.040                 | 0.048     | 0.038                   | 0.045     | 0.044                   | 0.053     |
| <i>R-DCN</i>           | 0.186                 | 0.225     | 0.175                   | 0.210     | 0.202                   | 0.247     |
| <i>R-VCN</i>           | 0.092                 | 0.111     | 0.086                   | 0.104     | 0.100                   | 0.122     |
| <i>R-DCIC</i>          | 0.035                 | 0.042     | 0.033                   | 0.040     | 0.038                   | 0.047     |
| <i>R-CIC</i>           | 0.035                 | 0.043     | 0.033                   | 0.040     | 0.038                   | 0.047     |
| <i>R-ECIC</i>          | 0.039                 | 0.047     | 0.037                   | 0.044     | 0.042                   | 0.052     |
| <i>R-MGB</i>           | 0.047                 | 0.057     | 0.044                   | 0.053     | 0.051                   | 0.063     |
| <i>R-AC</i>            | 0.044                 | 0.053     | 0.041                   | 0.050     | 0.048                   | 0.058     |
| <i>AMG<sub>S</sub></i> | 0.080                 | 0.097     | 0.075                   | 0.091     | 0.087                   | 0.107     |
| <i>AMG<sub>D</sub></i> | 0.069                 | 0.083     | 0.064                   | 0.078     | 0.075                   | 0.091     |
| <i>AMG<sub>C</sub></i> | 0.081                 | 0.098     | 0.076                   | 0.092     | 0.088                   | 0.108     |

|                       |       |       |       |       |       |       |
|-----------------------|-------|-------|-------|-------|-------|-------|
| <i>NA<sub>C</sub></i> | 0.090 | 0.109 | 0.085 | 0.102 | 0.098 | 0.120 |
| <i>NA<sub>S</sub></i> | 0.091 | 0.109 | 0.085 | 0.102 | 0.098 | 0.120 |
| <i>ACC</i>            | 0.031 | 0.038 | 0.030 | 0.036 | 0.034 | 0.042 |
| <i>HIPP</i>           | 0.157 | 0.190 | 0.148 | 0.178 | 0.171 | 0.209 |

**Supplementary Table S2:** Contrast-to-noise ratio difference between the three groups.

**MEMRI: Contrast-to-Noise Ratio Differences**

| <b>Region</b>          | <b>T+ (n=8) vs. T- (n=5)</b> | <b>T+ (n=8) vs. Ctrl (n=6)</b> | <b>T- (n=5) vs. Ctrl (n=6)</b> |
|------------------------|------------------------------|--------------------------------|--------------------------------|
| <i>L-DCN</i>           | 0.028                        | 0.104                          | 0.076                          |
| <i>L-VCN</i>           | 0.055                        | 0.045                          | -0.010                         |
| <i>L-DCIC</i>          | 0.028                        | 0.019                          | -0.009                         |
| <i>L-CIC</i>           | 0.006                        | 0.009                          | 0.003                          |
| <i>L-ECIC</i>          | 0.020                        | 0.028                          | 0.008                          |
| <i>L-MGB</i>           | 0.016                        | 0.038                          | 0.022                          |
| <i>L-AC</i>            | 0.013                        | 0.035                          | 0.022                          |
| <i>R-DCN</i>           | 0.073                        | 0.157                          | 0.083                          |
| <i>R-VCN</i>           | 0.009                        | 0.078                          | 0.069                          |
| <i>R-DCIC</i>          | 0.015                        | 0.030                          | 0.015                          |
| <i>R-CIC</i>           | 0.003                        | 0.024                          | 0.021                          |
| <i>R-ECIC</i>          | 0.015                        | 0.037                          | 0.022                          |
| <i>R-MGB</i>           | 0.011                        | 0.009                          | -0.001                         |
| <i>R-AC</i>            | 0.000                        | 0.028                          | 0.028                          |
| <i>AMG<sub>S</sub></i> | 0.013                        | 0.071                          | 0.058                          |
| <i>AMG<sub>D</sub></i> | 0.031                        | 0.070                          | 0.039                          |
| <i>AMG<sub>C</sub></i> | 0.020                        | 0.041                          | 0.021                          |
| <i>NA<sub>C</sub></i>  | 0.044                        | 0.049                          | 0.005                          |
| <i>NA<sub>S</sub></i>  | 0.036                        | 0.073                          | 0.038                          |
| <i>ACC</i>             | -0.002                       | 0.014                          | 0.016                          |

*HIPP*

-0.004

0.065

0.069

## Supplementary Figure S1

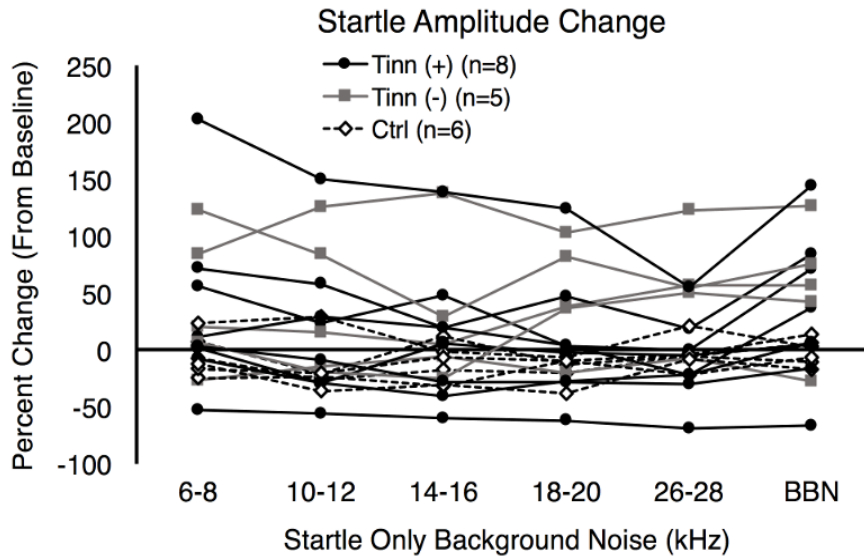

**Figure S1: Percent change in startle amplitude to the Startle Only condition (of gap-detection test) in individual animals.** Relative to baseline, startle amplitude either remained the same, increased, or decreased in individual animals after blast or sham-blast. However, these changes are not strictly observed in tinnitus positive animals, suggesting that startle amplitude did not confound tinnitus diagnosis.

## Supplementary Figure S2

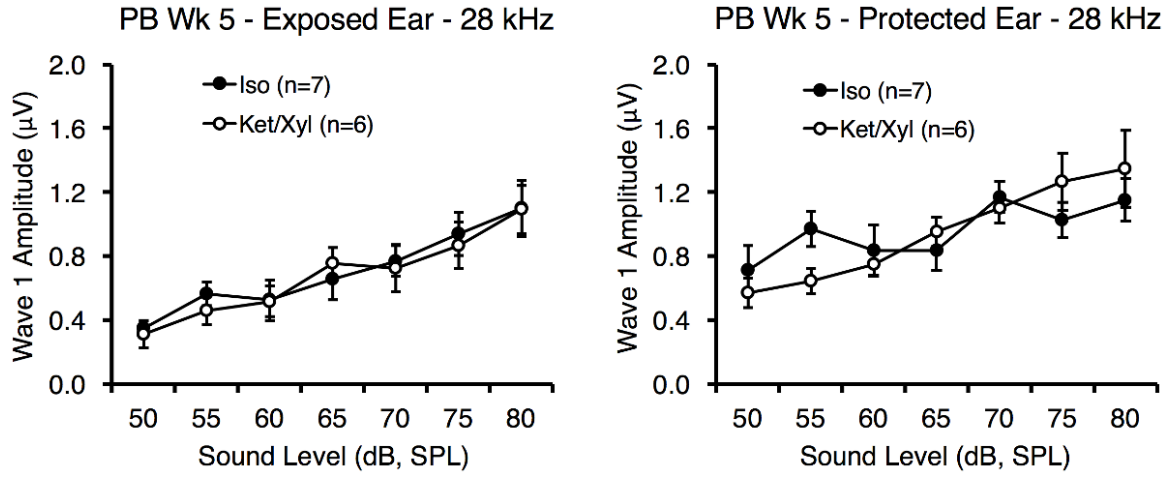

**Figure S2: ABR P1-N1 amplitude in rats blasted under isoflurane (Iso) vs. rats blasted under ketamine/xylazine (Ket/Xyl).** No significant differences were observed in P1-N1 amplitude between the two groups in either ear, suggesting a similar degree of blast-induced “hidden hearing loss”.
